# Supplementary material for: In Silico Characterization of the Secretome of the Fungal Pathogen Thielaviopsis punctulata, the Causal Agent of Date Palm Black Scorch Disease
Source: MDPI journal article supplement (doi:10.3390/jof9030303), 2023-02-27
Supplement: s1 [file s1]

**Table S3. Overview of CAZymes in the secretome of *Thielaviopsis* species**

| CAZyme Family | <i>Thielaviopsis</i> species |                      |                    |                   |                   |                  |
|---------------|------------------------------|----------------------|--------------------|-------------------|-------------------|------------------|
|               | <i>T. punctulata</i>         | <i>T. ethacetica</i> | <i>T. cerberus</i> | <i>T. euricoi</i> | <i>T. musarum</i> | <i>T. populi</i> |
| AA1           | KKA29108.1                   | Test_03282-RA        | T.cer_02404-RA     | T.eur_03837-RA    | Tmus_06880-RA     | T.pup_01818-RA   |
|               | KKA30055.1                   |                      |                    | T.eur_04384-RA    |                   | T.pup_02029-RA   |
|               | KKA28993.1                   |                      |                    |                   |                   |                  |
| AA16          | KKA29756.1                   |                      |                    |                   |                   |                  |
| AA2           | KKA28039.1                   |                      |                    | T.eur_02297-RA    |                   |                  |
|               | KKA29461.1                   |                      |                    |                   |                   |                  |
| AA3           | KKA28521.1                   | Test_02462-RA        |                    | T.eur_00155-RA    | Tmus_06232-RA     | T.pup_05686-RA   |
|               | KKA30608.1                   | Test_02495-RA        |                    | T.eur_00941-RA    | Tmus_06707-RA     |                  |
|               | KKA31082.1                   | Test_05836-RA        |                    | T.eur_00974-RA    |                   |                  |
| AA5           | KKA28638.1                   | Test_06742-RA        | T.cer_04144-RA     | T.eur_01371-RA    | Tmus_05249-RA     | T.pup_01027-RA   |
| AA7           | KKA27659.1                   |                      |                    |                   | Tmus_04258-RA     |                  |
|               | KKA30937.1                   |                      |                    |                   | Tmus_06194-RA     |                  |
| AA8           |                              | Test_01779-RA        | T.cer_01944-RA     | T.eur_01478-RA    |                   | T.pup_02050-RA   |

|      |            |               |                |                |               |                |
|------|------------|---------------|----------------|----------------|---------------|----------------|
|      |            |               |                |                |               | T.pup_02231-RA |
| AA9  | KKA27328.1 | Test_01326-RA |                | T.eur_02013-RA | Tmus_00287-RA | T.pup_02046-RA |
|      | KKA28212.1 | Test_01766-RA |                | T.eur_06378-RA | Tmus_02364-RA | T.pup_04518-RA |
|      | KKA28497.1 | Test_03489-RA |                | T.eur_06380-RA | Tmus_03461-RA | T.pup_04520-RA |
|      | KKA29219.1 | Test_03491-RA |                | T.eur_06526-RA | Tmus_06701-RA |                |
|      | KKA25994.1 | Test_04367-RA |                | T.eur_06579-RA | Tmus_06703-RA |                |
|      | KKA29038.1 |               |                |                |               |                |
|      | KKA25992.1 |               |                |                |               |                |
| AA11 |            | Test_03372-RA | T.cer_02164-RA | T.eur_02331-RA | Tmus_03171-RA | T.pup_02374-RA |
|      |            | Test_03859-RA |                | T.eur_02512-RA | Tmus_03228-RA |                |
| AA12 |            | Test_04402-RA |                |                |               |                |
| CE1  |            | Test_02988-RA | T.cer_02955-RA | T.eur_02141-RA | Tmus_00844-RA | T.pup_02171-RA |
|      |            |               |                | T.eur_05985-RA | Tmus_03737-RA |                |
| CE3  |            | Test_03304-RA |                |                |               |                |
| CE4  | KKA26186.1 | Test_01310-RA | T.cer_05232-RA | T.eur_05828-RA |               |                |
|      | KKA27343.1 |               |                |                |               |                |

|      |            |               |                |                |               |                |
|------|------------|---------------|----------------|----------------|---------------|----------------|
| CE5  | KKA30377.1 | Test_03741-RA | T.cer_04406-RA | T.eur_05948-RA | Tmus_00818-RA |                |
|      | KKA30382.1 |               | T.cer_04567-RA |                |               |                |
| GH03 | KKA26832.1 | Test_02208-RA | T.cer_01805-RA | T.eur_01772-RA | Tmus_01989-RA |                |
|      | KKA30767.1 | Test_02663-RA | T.cer_05853-RA | T.eur_04142-RA |               |                |
| GH05 |            |               |                |                | Tmus_01003-RA | T.pup_00268-RA |
|      |            |               |                |                |               |                |
|      | KKA28137.1 | Test_05858-RA | T.cer_06171-RA |                |               |                |
|      | KKA26007.1 |               |                |                |               |                |
|      | KKA26778.1 |               |                |                |               |                |
| GH06 |            |               |                | T.eur_06053-RA |               |                |
| GH07 | KKA26295.1 | Test_01774-RA | T.cer_02909-RA |                | Tmus_05285-RA |                |
|      | KKA28489.1 |               |                |                |               |                |
| GH10 | KKA27891.1 | Test_01612-RA | T.cer_04740-RA | T.eur_00342-RA | Tmus_00703-RA | T.pup_04970-RA |
|      | KKA29568.1 |               |                | T.eur_03277-RA | Tmus_04890-RA |                |
| GH11 | KKA29107.1 | Test_02894-RA | T.cer_00211-RA | T.eur_02105-RA | Tmus_03052-RA | T.pup_02434-RA |
|      | KKA30007.1 | Test_03021-RA | T.cer_00248-RA | T.eur_02230-RA | Tmus_05573-RA |                |

|       |            |               |                |                |               |                |
|-------|------------|---------------|----------------|----------------|---------------|----------------|
|       |            | Test_05896-RA | T.cer_04430-RA | T.eur_04262-RA |               |                |
| GH12  |            |               | T.cer_05248-RA |                |               |                |
| GH13  |            |               |                |                |               | T.pup_03937-RA |
| GH115 | KKA28239.1 |               |                |                |               |                |
| GH125 | KKA28305.1 |               |                |                |               |                |
| GH128 | KKA29105.1 |               |                |                |               |                |
| GH13  | KKA30803.1 |               |                |                |               |                |
| GH131 | KKA28951.1 |               |                | T.eur_00151-RA |               | T.pup_01834-RA |
|       | KKA29646.1 |               |                |                |               |                |
| GH132 | KKA26122.1 |               |                |                |               |                |
| GH15  | KKA29558.1 |               |                |                |               | T.pup_01221-RA |
| GH16  | KKA30944.1 | Test_01549-RA | T.cer_05003-RA | T.eur_00403-RA | Tmus_04715-RA | T.pup_03572-RA |
|       | KKA27451.1 | Test_02225-RA | T.cer_04189-RA | T.eur_05243-RA | Tmus_01083-RA | T.pup_01931-RA |
|       | KKA26151.1 | Test_04541-RA | T.cer_05132-RA | T.eur_06909-RA | Tmus_02351-RA | T.pup_05073-RA |
|       | KKA28499.1 | Test_06379-RA | T.cer_03925-RA | T.eur_06418-RA |               |                |
|       |            | Test_06873-RA | T.cer_05758-RA | T.eur_06503-RA |               |                |

|      |            |               |                |                |               |                |
|------|------------|---------------|----------------|----------------|---------------|----------------|
| GH17 |            | Test_06398-RA | T.cer_04669-RA | T.eur_02647-RA | Tmus_05762-RA | T.pup_04902-RA |
|      | KKA27515.1 | Test_00795-RA | T.cer_02087-RA | T.eur_02730-RA | Tmus_00656-RA | T.pup_00172-RA |
|      | KKA30054.1 | Test_03483-RA | T.cer_02495-RA | T.eur_03840-RA | Tmus_04290-RA | T.pup_03210-RA |
|      | KKA30697.1 |               | T.cer_02547-RA |                | Tmus_04319-RA | T.pup_04965-RA |
|      | KKA26416.1 |               |                |                |               |                |
| GH20 | KKA30299.1 | Test_02221-RA | T.cer_06535-RA | T.eur_04129-RA | Tmus_01079-RA | T.pup_00618-RA |
| GH28 | KKA31208.1 |               | T.cer_05134-RA |                |               |                |
| GH30 | KKA27339.1 | Test_01303-RA | T.cer_03773-RA | T.eur_05822-RA | Tmus_02572-RA |                |
|      | KKA29858.1 | Test_01905-RA |                |                |               |                |
| GH31 |            |               |                |                | Tmus_00763-RA |                |
| GH32 | KKA28220.1 | Test_01348-RA | T.cer_06473-RA | T.eur_05865-RA | Tmus_06395-RA | T.pup_03291-RA |
| GH37 | KKA30799.1 |               | T.cer_00448-RA |                |               |                |
| GH38 | KKA26248.1 |               |                |                |               |                |
| GH43 | KKA28970.1 | Test_04417-RA | T.cer_00615-RA | T.eur_06953-RA | Tmus_05267-RA | T.pup_05151-RA |
|      | KKA29859.1 | Test_01906-RA | T.cer_07857-RA | T.eur_02063-RA | Tmus_02571-RA | T.pup_02166-RA |
|      | KKA30545.1 | Test_06941-RA | T.cer_06416-RA | T.eur_02859-RA | Tmus_06751-RA | T.pup_01537-RA |

|      |            |               |                |                |               |                |
|------|------------|---------------|----------------|----------------|---------------|----------------|
|      | KKA27803.1 | Test_04823-RA | T.cer_03683-RA | T.eur_04875-RA |               |                |
|      |            |               |                | T.eur_05513-RA |               |                |
| GH45 | KKA28018.1 |               |                |                |               |                |
| GH51 | KKA29147.1 |               |                |                |               |                |
| GH53 | KKA29651.1 |               |                |                |               | T.pup_04245-RA |
| GH55 | KKA30026.1 | Test_05771-RA | T.cer_02346-RA | T.eur_04781-RA |               | T.pup_02839-RA |
|      | KKA30509.1 |               |                |                |               | T.pup_05194-RA |
| GH63 |            | Test_00128-RA |                | T.eur_00572-RA | Tmus_04737-RA |                |
| GH64 | KKA27366.1 |               |                |                |               |                |
| GH72 |            | Test_02198-RA | T.cer_02621-RA | T.eur_04152-RA | Tmus_05081-RA | T.pup_00010-RA |
|      |            |               | T.cer_03435-RA | T.eur_04630-RA | Tmus_05337-RA | T.pup_00923-RA |
|      |            |               |                |                |               | T.pup_04546-RA |
| GH74 |            |               | T.cer_02329-RA | T.eur_06581-RA |               |                |
| GH76 | KKA26192.1 | Test_00116-RA | T.cer_01044-RA | T.eur_00560-RA |               | T.pup_00396-RA |
|      |            | Test_04990-RA | T.cer_01269-RA | T.eur_04963-RA | Tmus_02078-RA | T.pup_06102-RA |
|      |            |               |                |                | Tmus_04908-RA |                |
| GH78 | KKA27604.1 |               | T.cer_01031-RA |                |               |                |

|      |            |               |                |                |               |                |
|------|------------|---------------|----------------|----------------|---------------|----------------|
| GH92 |            | Test_04019-RA |                | T.eur_02770-RA | Tmus_03757-RA | T.pup_00920-RA |
| GH93 | KKA30496.1 | Test_03146-RA |                |                | Tmus_06638-RA |                |
| GT4  | KKA26489.1 |               |                |                |               |                |
| GT8  |            |               |                | T.eur_04896-RA |               | T.pup_02843-RA |
| GT32 |            |               |                |                |               | T.pup_04652-RA |
| GT34 |            | Test_00049-RA |                | T.eur_00490-RA | Tmus_00078-RA |                |
| GT61 |            | Test_02790-RA |                |                |               |                |
| PL1  | KKA26877.1 | Test_05522-RA | T.cer_02030-RA | T.eur_02387-RA | Tmus_06398-RA | T.pup_03027-RA |
|      | KKA27238.1 | Test_06829-RA |                | T.eur_06641-RA |               | T.pup_03895-RA |
| PL3  | KKA30830.1 | Test_05658-RA |                | T.eur_05722-RA |               | T.pup_04517-RA |
| PL4  | KKA28462.1 |               |                |                |               | T.pup_05359-RA |
