# Supplementary material for: In Silico Characterization of the Secretome of the Fungal Pathogen Thielaviopsis punctulata, the Causal Agent of Date Palm Black Scorch Disease
Source: MDPI journal article supplement (doi:10.3390/jof9030303), 2023-02-27
Supplement: s1 [file s1]

Supplementary Table S4. Secretory proteases in Six Thielaviopsis species

| Protease Family   | Protease Family member | PFAM domain | <i>T. punctulata</i> | <i>T. cerberus</i> | <i>T. musarum</i> | <i>T. ethacetica</i> | <i>T. euricoi</i> | <i>T. populi</i> |
|-------------------|------------------------|-------------|----------------------|--------------------|-------------------|----------------------|-------------------|------------------|
|                   |                        |             | Protein_ID           | Protein_ID         | Protein_ID        | Protein_ID           | Protein_ID        | Protein_ID       |
| Aspartic protease | Asp_2                  | PF00026.26  | KKA30396.1           | T.cer_06062-       | Tmus_03923-RA     | Test_06399-          |                   | T.pup_0189       |
|                   |                        | PF00026.26  | KKA30997.1           | T.cer_05252-       | Tmus_05761-RA     | Test_07058-          |                   | T.pup_0370       |
|                   |                        | PF00026.26  | KKA30325.1           | T.cer_04668-       | Tmus_04944-RA     | Test_03944-          |                   | T.pup_03666      |
|                   | Peptidase_A4           | PF01828.20  | KKA31244.1           |                    | Tmus_06792-RA     | Test_03342-          |                   |                  |
| Carboxy           | Peptidase_C13          | PF01650.21  | KKA30601.1           | T.cer_00703-       | Tmus_06059-RA     | Test_01795-          | T.eur_06606-RA    | T.pup_04166      |
|                   | Peptidase_C19          | PF01650.21  |                      | T.cer_07956-       | Tmus_04466-RA     | Test_06152-          |                   | T.pup_0510       |
| Metallo protease  | Peptidase_M14          | PF00246.27  | KKA28028.1           | T.cer_03215-       | Tmus_00763-RA     | Test_06184-          |                   |                  |
|                   |                        | PF00246.27  | KKA28562.1           |                    |                   | Test_02270-          |                   |                  |
|                   | Peptidase_M20          | PF01546.31  |                      |                    | Tmus_04757-RA     | Test_04347-          |                   | T.pup_02179      |
|                   | Peptidase_M28          | PF04389.20  | KKA26478.1           | T.cer_03724-RA     | Tmus_00266-RA     | Test_04128-          |                   | T.pup_0358       |
|                   |                        | PF04389.20  | KKA27661.1           |                    | Tmus_03937-RA     |                      |                   |                  |
|                   | Peptidase_M36          | PF02128.18  | KKA27194.1           |                    | Tmus_04757-RA     |                      |                   |                  |
|                   | Peptidase_M43          | PF05572.16  | KKA26166.1           | T.cer_07857-       | Tmus_05267-RA     |                      |                   |                  |
| Serine petidase   | Peptidase_S8           | PF00082.25  | KKA26451.1           | T.cer_05301-RA     | Tmus_06699-RA     | Test_04445-          | T.eur_02394-RA    | T.pup_04575      |
|                   |                        | PF00082.25  | KKA27603.1           | T.cer_01257-RA     | Tmus_00079-RA     | Test_06823-          | T.eur_02739-RA    | T.pup_01758      |
|                   |                        | PF00082.25  | KKA27995.1           | T.cer_00335-       | Tmus_03525-RA     | Test_01877-          | T.eur_02884-RA    | T.pup_0230       |
|                   |                        | PF00082.25  | KKA29831.1           |                    | Tmus_02599-RA     | Test_06091-          | T.eur_06382-RA    | T.pup_06089      |
|                   |                        | PF00082.25  | KKA30987.1           |                    | Tmus_00663-RA     | Test_03988-          | T.eur_00167-RA    |                  |
|                   |                        | PF00082.25  | KKA30584.1           |                    | Tmus_06403-RA     | Test_03070-          | T.eur_03473-RA    |                  |
|                   |                        | PF00082.25  | KKA27233.1           |                    | Tmus_00996-RA     |                      |                   |                  |
|                   |                        | PF00082.25  | KKA28625.1           |                    |                   |                      |                   |                  |
|                   |                        | PF00082.25  | KKA26827.1           |                    |                   |                      |                   |                  |
|                   |                        | PF09286.14  | KKA31088.1           |                    |                   |                      |                   |                  |
|                   | Peptidase_S9           | PF00326.24  |                      | T.cer_02955-RA     | Tmus_03737-RA     | Test_02988-          | T.eur_02141-RA    | T.pup_02171      |
|                   |                        | PF00326.24  |                      | T.cer_04113-       | Tmus_00844-RA     | Test_02088-          |                   |                  |
|                   |                        | PF00326.24  |                      | T.cer_06039-       | Tmus_05925-RA     | Test_02094-          |                   |                  |
|                   |                        | PF00326.24  |                      | T.cer_02594-RA     |                   | Test_05105-          |                   |                  |

|  |               |            |            |  |  |             |  |             |
|--|---------------|------------|------------|--|--|-------------|--|-------------|
|  | Peptidase_S10 | PF00450.25 | KKA31040.1 |  |  | Test_00210- |  | T.pup_05100 |
|  | Peptidase_S10 | PF00450.25 | KKA26396.1 |  |  |             |  |             |
|  | Peptidase_S28 | PF05577.15 | KKA31228.1 |  |  |             |  |             |
|  | Peptidase_41  | PF03572.21 |            |  |  |             |  | T.pup_03479 |
|  |               |            |            |  |  |             |  |             |
