# Supplementary material for: In Silico Characterization of the Secretome of the Fungal Pathogen Thielaviopsis punctulata, the Causal Agent of Date Palm Black Scorch Disease
Source: MDPI journal article supplement (doi:10.3390/jof9030303), 2023-02-27
Supplement: s1 [file s1]

Supplementary Table S5. PHI homologs of secretory proteins of *T. punctulata*

| Family         | Protein id | Enzyme name                       | PHI-base entry | Gene Name                            | Species name               | Mutant Phenotype                        |  |
|----------------|------------|-----------------------------------|----------------|--------------------------------------|----------------------------|-----------------------------------------|--|
| <b>Cazymes</b> |            |                                   |                |                                      |                            |                                         |  |
| AA9            | KKA27328.1 | lytic cellulose monooxygenase     | PHI:3216       | MoCDIP4                              | Magnaporthe_oryzae         | effector_(plant_avirulence_determinant) |  |
| AA9            | KKA28497.1 | lytic cellulose monooxygenase     | PHI:3216       | MoCDIP4                              | Magnaporthe_oryzae         | effector_(plant_avirulence_determinant) |  |
| AA9            | KKA25992.1 | endo- $\beta$ -1,4-glucanase      | PHI:3216       | MoCDIP4                              | Magnaporthe_oryzae         | effector_(plant_avirulence_determinant) |  |
| GH05           | KKA26778.1 | endo- $\beta$ -1,4-glucanase      | PHI:3216       | MoCDIP4                              | Magnaporthe_oryzae         | effector_(plant_avirulence_determinant) |  |
| GH07           | KKA26295.1 | cellulose 1,4-beta-cellobiosidase | PHI:3216       | MoCDIP4                              | Magnaporthe_oryzae         | effector_(plant_avirulence_determinant) |  |
| GH11           | KKA30007.1 | endo- $\beta$ -1,4-xylanase       | PHI:11606      | Vd424Y                               | Verticillium_dahliae       | effector_(plant_avirulence_determinant) |  |
| AA1            | KKA29108.1 | Laccase                           | PHI:2700       | Lac2                                 | Colletotrichum_orbiculare  | reduced_virulence                       |  |
| AA1            | KKA30055.1 | Laccase                           | PHI:2920       | FET3-1__Fet3-1                       | Colletotrichum_graminicola | reduced_virulence                       |  |
| AA2            | KKA29461.1 | peroxidase                        | PHI:5186       | MoAPX2                               | Magnaporthe_oryzae         | reduced_virulence                       |  |
| AA5            | KKA28638.1 | Oxidase with oxygen as acceptor   | PHI:5393       | GLX                                  | Fusarium_oxysporum         | reduced_virulence                       |  |
| GH03           | KKA26832.1 | $\beta$ -glucosidase              | PHI:10367      | BcBGL3_(BCIN_10g05590)               | Botrytis_cinerea           | reduced_virulence                       |  |
| GH03           | KKA30767.1 | $\beta$ -glucosidase              | PHI:10367      | BcBGL3_(BCIN_10g05590)               | Botrytis_cinerea           | reduced_virulence                       |  |
| GH10           | KKA29568.1 | endo-1,4- $\beta$ -xylanase       | PHI:2204       | Endo-1_4-beta-xylanase [GH10 family] | Magnaporthe_oryzae         | reduced_virulence                       |  |
| GH125          | KKA28305.1 | exo- $\alpha$ -1,6-mannosidase    | PHI:785        | MGG_04128                            | Magnaporthe_oryzae         | reduced_virulence                       |  |
| GH16           | KKA27451.1 | licheninase                       | PHI:6265       | Eng1                                 | Histoplasma_capsulatum     | reduced_virulence                       |  |
| GT4            | KKA26489.1 | $\alpha$ -1,6-mannosyltransferase | PHI:9793       | VdOCH1                               | Verticillium_dahliae       | reduced_virulence                       |  |

|                           |            |                               |           |            |                             |                          |
|---------------------------|------------|-------------------------------|-----------|------------|-----------------------------|--------------------------|
| PL1                       | KKA26877.1 | pectin lyase                  | PHI:3226  | Pnl1       | Penicillium_digitatum       | reduced_virulence        |
| PL1                       | KKA27238.1 | pectin lyase                  | PHI:3226  | Pnl1       | Penicillium_digitatum       | reduced_virulence        |
| PL3                       | KKA30830.1 | pectate lyase                 | PHI:180   | PELD       | Fusarium_solani             | reduced_virulence        |
| AA3                       | KKA28521.1 | Cellobiose dehydrogenase      | PHI:11560 | B0604      | Brucella_melitensis         | unaffected_pathogenicity |
| AA7                       | KKA27659.1 | glucooligosaccharide oxidase  | PHI:716   | ZEB1       | Fusarium_graminearum        | unaffected_pathogenicity |
| AA9                       | KKA28212.1 | lytic cellulose monooxygenase | PHI:1575  | GzOB015    | Fusarium_graminearum        | unaffected_pathogenicity |
| AA9                       | KKA25994.1 | endo- $\beta$ -1,4-glucanase  | PHI:1575  | GzOB015    | Fusarium_graminearum        | unaffected_pathogenicity |
| AA9                       | KKA29219.1 | lytic cellulose monooxygenase | PHI:1575  | GzOB015    | Fusarium_graminearum        | unaffected_pathogenicity |
| CE4                       | KKA26186.1 | chitin deacetylase            | PHI:6391  | CDA2       | Magnaporthe_oryzae          | unaffected_pathogenicity |
| GH05                      | KKA26007.1 | endo- $\beta$ -1,4-glucanase  | PHI:2043  | XYL-6      | Magnaporthe_oryzae          | unaffected_pathogenicity |
| GH07                      | KKA28489.1 | endo- $\beta$ -1,4-glucanase  | PHI:566   | Cel2       | Bipolaris_zeicola           | unaffected_pathogenicity |
| GH10                      | KKA27891.1 | endo-1,4- $\beta$ -xylanase   | PHI:4246  | Xyl03624   | Fusarium_graminearum        | unaffected_pathogenicity |
| GH37                      | KKA30799.1 | $\alpha,\alpha$ -trehalase    | PHI:7228  | Tre1       | Magnaporthe_oryzae          | unaffected_pathogenicity |
| <b>Proteases</b>          |            |                               |           |            |                             |                          |
| C13                       | KKA30601.1 | Carboxy peptidase             | PHI:6827  | GPI8       | Colletotrichum_graminicola  | loss_of_pathogenicity    |
| M43                       | KKA26166.1 | Metallo peptidase             | PHI:11257 | FoMep1     | Fusarium_oxysporum          | reduced_virulence        |
| M43                       | KKA27603.1 | Metallo peptidase             | PHI:2117  | SPM1       | Magnaporthe_oryzae          | reduced_virulence        |
| M43                       | KKA30997.1 | Metallo peptidase             | PHI:697   | Ugt51E1    | Leptosphaeria_maculans      | unaffected_pathogenicity |
| M36                       | KKA27194.1 | Metallo peptidase             | PHI:4972  | MEP3       | Trichophyton_mentagrophytes | unaffected_pathogenicity |
| M36                       | KKA29831.1 | Metallo peptidase             | PHI:5892  | FGSG_09382 | Fusarium_graminearum        | unaffected_pathogenicity |
| M36                       | KKA27233.1 | Metallo peptidase             | PHI:5893  | FGSG_10525 | Fusarium_graminearum        | unaffected_pathogenicity |
| <b>Putative effectors</b> |            |                               |           |            |                             |                          |

|  |            |                                        |           |                        |                            |                          |
|--|------------|----------------------------------------|-----------|------------------------|----------------------------|--------------------------|
|  | KKA29596.1 | <b>GlcNAc-PI de-N-acetylase</b>        | PHI:6825  | GPI12                  | Colletotrichum_graminicola | loss_of_pathogenicity    |
|  | KKA26926.1 | Egh16-like                             | PHI:256   | GAS1                   | Magnaporthe_oryzae         | reduced_virulence        |
|  | KKA26947.1 | Egh16-like                             | PHI:256   | GAS1                   | Magnaporthe_oryzae         | reduced_virulence        |
|  | KKA27620.1 | CAP superfamily protein                | PHI:7144  | FvSCP1                 | Fusarium_verticillioides   | reduced_virulence        |
|  | KKA27672.1 | Egh16-like                             | PHI:257   | GAS2                   | Magnaporthe_oryzae         | reduced_virulence        |
|  | KKA25960.1 | Exo_endo_phosphatase                   | PHI:5754  |                        | Fusarium_graminearum       | reduced_virulence        |
|  | KKA28484.1 | Hypothetical protein                   | PHI:3209  | Pop1                   | Ceratocystis_harringtonii  | reduced_virulence        |
|  | KKA28667.1 | Spherulation-specific family 4 protein | PHI:10749 | CLU5d_(GLRG_04689)     | Colletotrichum_graminicola | reduced_virulence        |
|  | KKA27537.1 | HD-ZIP protein                         | PHI:8208  |                        | Colletotrichum_graminicola | reduced_virulence        |
|  | KKA28836.1 | cerato-platanin                        | PHI:9428  | SsSm1_(SS1G_10096)     | Sclerotinia_sclerotiorum   | reduced_virulence        |
|  | KKA29410.1 | Egh16-like                             | PHI:256   | GAS1                   | Magnaporthe_oryzae         | reduced_virulence        |
|  | KKA29465.1 | TRP_N protein                          | PHI:803   | MGG_04629              | Magnaporthe_oryzae         | reduced_virulence        |
|  | KKA29708.1 | Hypothetical protein                   | PHI:10749 | CLU5d_(GLRG_04689)     | Colletotrichum_graminicola | reduced_virulence        |
|  | KKA30907.1 | Hypothetical protein                   | PHI:10368 | BcBGL4_(BCIN_03g08710) | Botrytis_cinerea           | reduced_virulence        |
|  | KKA29951.1 | S1-P1_nuclease                         | PHI:10751 | CLU5c_(GLRG_04688)     | Colletotrichum_graminicola | unaffected_pathogenicity |
